# Supplementary material for: Climate stability shaped fire regimes over the past ~1400 years in northeastern China
Source: Research Square preprint supplement (doi:10.21203/rs.3.rs-7647453/v1), 2025-09-19
Supplement: Supplementary file 1 [file 0388c1a220a1c7d34a0c9a9d.xlsx]

## Sheet: Sheet1
Age(CE)	>125μm (pieces·cm⁻²·yr⁻¹)	<125μm (pieces·cm⁻²·yr⁻¹)	total (pieces·cm⁻²·yr⁻¹)
1789	120.743	1389.95	1510.69
1771	91.214	828.223	919.437
1755	168.349	1868.67	2037.02
1740	76.132	934.898	1011.03
1724	136.121	1483.49	1619.61
1708	227.493	1664.12	1891.62
1691	191.728	1412.62	1604.34
1675	200.967	1724.43	1925.4
1659	185.966	1519.54	1705.51
1641	181.275	1596.16	1777.43
1625	139.348	1972.49	2111.84
1609	110.679	1764.54	1875.22
1603	194	1897.71	2091.71
1580	113.214	1593.7	1706.91
1560	246.426	2156.22	2402.65
1540	216.135	3005.16	3221.3
1519	264.966	3774.1	4039.06
1498	202.308	2327.66	2529.97
1478	317.086	2838.96	3156.05
1460	334.576	3340.8	3675.38
1441	252.812	3273.48	3526.29
1424	458.394	4234.69	4693.09
1410	185.205	2596.98	2782.18
1393	152.248	2476.03	2628.28
1378	240.854	3231.08	3471.93
1361	133.084	1937.7	2070.79
1347	170.433	2801.92	2972.35
1333	156.312	1991.72	2148.03
1319	226.412	3269.98	3496.39
1303	189.067	2355.23	2544.3
1284	138.117	1677.72	1815.84
1263	263.381	2643.45	2906.83
1248	224.866	2944.93	3169.8
1229	178.476	1616.06	1794.54
1210	121.934	1941.57	2063.51
1192	138.9	1972.37	2111.27
1172	252.908	2198.89	2451.8
1152	207.321	2073.21	2280.53
1135	246.136	2727	2973.13
1115	372.545	4086.59	4459.13
1098	269.628	2505.09	2774.72
1079	315.887	3519.88	3835.77
1063	159.567	2406.27	2565.84
1043	192.006	1848.46	2040.47
1024	347.664	3559.42	3907.08
1007	312.089	2252.78	2564.87
988	212.139	2012.1	2224.24
969	265.233	3972.73	4237.97
951	169.834	2809.97	2979.81
930	259.157	2656.36	2915.51
911	208.036	2621.91	2829.95
892	114.924	1892.04	2006.97
874	178.167	2022.53	2200.7
858	242.424	2931.82	3174.24
843	341	3608.46	3949.46
828	153.647	1244.54	1398.19
812	393.013	3816.36	4209.38
800	387.27	7284.68	7671.95
787	292.93	4312.32	4605.25
771	373.787	4157.16	4530.95
757	254.376	4512.23	4766.61
742	296.11	3467.35	3763.46
727	352.39	4649.5	5001.89
712	359.641	3380.62	3740.26
698	282.948	4438.75	4721.7
682	427.887	3854.91	4282.79
665	196.443	2340.67	2537.12
650	174.528	3280.11	3454.63
635	257.661	3766.76	4024.43
620	413.19	5681.37	6094.56
