# Supplementary material for: Climate stability shaped fire regimes over the past ~1400 years in northeastern China
Source: Research Square preprint supplement (doi:10.21203/rs.3.rs-7647453/v1), 2025-09-19
Supplement: Supplementary file 2 [file f310517169ed9cf7eb7e4b9e.xlsx]

## Sheet: Sheet1
Age(CE)	soot flux(μg·cm⁻²·yr⁻¹)
2017	5.07125
2011	2.47629
2004	2.64807
1996	3.25503
1990	24.1244
1988	26.3858
1986	14.2287
1984	13.3411
1981	12.4382
1978	15.2096
1976	9.10032
1974	11.9501
1972	15.0781
1970	9.00222
1967	12.1338
1965	11.5657
1963	9.11614
1961	5.00959
1957	10.5405
1954	5.26763
1951	4.71333
1948	6.4506
1944	6.42032
1940	5.53339
1936	4.72259
1932	6.00176
1928	9.17409
1925	6.10304
1921	6.3277
1917	6.36792
1914	5.2593
1911	5.64503
1907	7.44923
1903	9.37782
1900	5.77656
1896	5.05132
1892	8.37657
1889	3.61429
1885	4.33817
1881	4.79501
1877	6.36733
1873	7.69152
1869	7.78632
1865	6.98578
1861	6.21541
1856	5.25647
1851	8.02541
1847	6.50023
1843	5.92228
1839	2.58299
1833	3.61126
1828	5.20185
1824	4.98223
1819	6.68751
1811	6.6954
1807	3.59476
1801	4.98149
1796	4.81725
1791	6.1382
1786	4.78591
1782	5.62657
1778	8.98923
1774	5.60886
1769	9.83645
1765	8.48335
1761	9.40453
1757	9.84973
1753	10.5373
1749	8.8512
1745	10.9198
1742	6.86985
1738	8.20067
1734	8.89619
1730	9.46016
1726	7.6596
1722	8.31392
1718	8.67473
1714	7.00531
1710	9.16772
1706	9.58131
1702	8.08341
1697	10.9968
1693	12.6145
1689	9.08935
1685	8.86218
1681	7.28615
1677	7.17987
1673	6.60536
1669	8.75472
1665	11.2404
1661	10.3949
1657	7.72105
1647	9.38518
1643	7.8592
1639	9.96246
1635	7.9328
1631	7.60241
1627	6.18754
1623	7.78227
1619	6.65704
1615	7.28868
1611	7.09614
1607	10.3258
1601	6.16535
1595	7.84571
1589	7.49875
1584	6.04686
1577	5.09723
1572	8.11605
1568	7.00101
1563	6.47634
1557	9.67278
1552	8.25984
1547	10.2375
1542	12.4678
1538	9.3484
1533	4.95509
1528	6.4797
1522	6.90097
1517	7.79411
1511	8.77207
1506	6.93905
1500	9.75106
1496	7.28884
1491	11.4976
1486	9.24058
1481	10.7117
1476	7.88568
1471	9.77575
1467	8.57805
1462	11.502
1458	8.68073
1453	6.84035
1448	12.6921
1444	10.8346
1439	13.1933
1435	13.7907
1431	14.5666
1426	15.3588
1422	17.7547
1419	8.79661
1415	13.9079
1412	7.63036
1408	10.684
1404	9.03469
1399	13.1032
1395	9.03196
1390	18.9243
1387	9.95688
1383	17.2852
1380	12.0931
1376	17.0301
1373	10.742
1369	10.0016
1364	7.64821
1359	10.5308
1355	12.8786
1352	13.8954
1349	13.1772
1345	12.9721
1341	12.8713
1338	17.3244
1332	8.77913
1328	10.336
1325	8.81727
1321	6.73801
1317	8.76918
1313	9.26377
1309	11.1166
1305	12.5894
1301	8.89809
1296	8.88355
1292	11.0285
1287	7.73704
1282	8.81754
1277	6.41848
1271	8.31923
1266	8.31496
1261	10.7431
1257	9.85981
1253	12.3143
1250	10.5299
1246	7.08925
1241	8.71501
1236	9.23434
1232	5.16745
1226	9.51564
1222	6.24801
1217	9.36532
1212	11.7782
1208	9.36152
1204	8.25457
1200	6.16013
1195	6.02046
1189	9.24308
1185	6.48412
1180	10.3894
1175	9.041
1169	7.20853
1163	8.61016
1158	14.7776
1154	13.8305
1150	17.6087
1146	10.8459
1142	6.89717
1137	10.5446
1132	13.7104
1128	12.7673
1123	12.1518
1118	13.5796
1113	12.1293
1109	6.85884
1104	10.6649
1100	10.6441
1090	12.1059
1085	8.70564
1081	10.1196
1077	12.543
1073	12.7485
1069	10.7996
1065	8.06664
1061	7.29986
1056	7.11015
1050	7.988
1031	7.66825
1026	11.9153
1022	9.07624
1017	13.9079
1013	11.7721
1009	9.36516
1004	11.4203
1000	7.97283
995	8.70237
991	7.2293
985	8.94347
981	11.864
977	8.11704
972	6.97932
966	9.18217
962	10.0439
958	7.62396
953	7.03022
948	7.84108
943	10.1241
938	7.34632
932	13.8027
928	8.73629
923	13.746
918	9.00826
913	12.8431
909	9.21315
904	10.4828
899	6.47926
894	11.3402
890	6.92512
885	10.6249
881	7.2712
876	10.493
871	11.2999
864	9.2074
860	12.1019
856	8.38
852	10.554
848	7.72884
844	15.7041
841	7.4871
837	16.9282
834	11.2069
830	18.9051
826	10.7175
822	15.8066
818	8.40033
814	13.0984
810	26.2346
808	32.425
806	10.4999
802	15.3122
794	25.8744
791	15.4481
788	27.2409
785	14.4418
781	18.2423
777	13.663
773	19.5344
769	15.5476
766	19.3227
762	10.0044
758	22.9684
755	14.5931
751	22.0582
748	14.4301
741	13.8251
737	17.4202
733	11.9784
729	18.5538
725	18.8292
722	18.1691
718	15.763
714	21.2288
711	14.2023
707	18.5691
703	17.056
700	13.5303
696	12.4999
692	22.7305
688	11.1816
684	14.4821
680	12.1613
676	15.3593
672	9.46026
667	12.9857
663	11.749
659	16.3224
655	19.4962
652	16.7458
644	13.7788
640	8.5723
636	23.16
633	19.2765
630	12.8765
626	12.5316
622	10.577
617	10.5783
613	12.3088
