# Supplementary material for: Climate stability shaped fire regimes over the past ~1400 years in northeastern China
Source: Research Square preprint supplement (doi:10.21203/rs.3.rs-7647453/v1), 2025-09-19
Supplement: Supplementary file 3 [file f8a473e927ede77f7c5c122b.xlsx]

## Sheet: Sheet1
Age(CE)	soot_int flux (μg·cm⁻²·yr⁻¹)	soot background (μg·cm⁻²·yr⁻¹)	Peaks	thresh FinalPos (μg·cm⁻²·yr⁻¹)	thresh FinalNeg (μg·cm⁻²·yr⁻¹)	SNI (index)	peaks Final	peak Mag (μg·cm⁻²·peak⁻¹)	Peak Frequency (peaks 200yr-1)
2017	5.07125	7.90568	-2.83443	3.27725	-6.95142	3.49169	0	0	1.6883
2013	3.69583	7.88301	-4.18718	3.28251	-6.86491	3.4958	0	0	1.66131
2009	2.47629	7.85704	-5.38075	3.28661	-6.77821	3.49963	0	0	1.63462
2005	2.61801	7.82791	-5.20989	3.28952	-6.69134	3.50315	0	0	1.60825
2001	2.64807	7.79595	-5.14788	3.29125	-6.6043	3.50631	0	0	1.58219
1997	3.11622	7.76166	-4.64545	3.2918	-6.51708	3.50906	0	0	1.55646
1993	6.67746	7.72575	-1.04829	3.29119	-6.42971	3.51136	0	0	1.53105
1989	22.7812	7.68904	15.0921	3.28942	-6.3422	3.51318	0	0	1.50597
1985	13.9245	7.65244	6.27203	3.28653	-6.25456	3.51447	0	0	1.4812
1981	13.3466	7.61658	5.72998	3.28253	-6.16679	3.51521	0	0	1.45674
1977	11.3401	7.58194	3.75814	3.27743	-6.07892	3.51537	0	0	1.4326
1973	12.7439	7.54887	5.19499	3.27128	-5.99096	3.5149	1	157.12	1.40876
1969	10.6822	7.51757	3.16457	3.26414	-5.90294	3.5138	0	0	1.38523
1965	10.3409	7.48812	2.85278	3.25606	-5.81489	3.51202	0	0	1.362
1961	5.00959	7.46038	-2.4508	3.24711	-5.72684	3.50955	0	0	1.33906
1957	9.2223	7.4341	1.7882	3.23738	-5.63881	3.50639	0	0	1.31642
1953	4.99048	7.40884	-2.41837	3.22692	-5.55084	3.50252	0	0	1.29408
1949	6.19851	7.38398	-1.18547	3.21584	-5.46295	3.49797	0	0	1.27203
1945	6.42789	7.35862	-0.93073	3.2042	-5.37519	3.49278	0	0	1.25027
1941	5.75512	7.33152	-1.5764	3.19208	-5.28759	3.487	0	0	1.22881
1937	4.92529	7.30089	-2.3756	3.17954	-5.20019	3.48073	0	0	1.20764
1933	5.68197	7.26394	-1.58198	3.16655	-5.11302	3.47411	0	0	1.1868
1929	8.32608	7.21622	1.10986	3.15287	-5.02608	3.46733	0	0	1.16634
1925	6.10304	7.15015	-1.04711	3.1377	-4.93927	3.4605	0	0	1.14649
1921	6.3277	7.0535	-0.7258	3.11906	-4.85231	3.45341	0	0	1.12782
1917	6.09077	6.91225	-0.82148	3.09362	-4.76473	3.44506	0	0	1.1113
1913	5.59388	6.77653	-1.18265	3.03668	-4.68073	3.40604	0	0	1.11326
1909	6.54713	6.63759	-0.09046	2.97686	-4.59817	3.35994	0	0	1.11949
1905	8.44818	6.50247	1.94571	2.91561	-4.51728	3.30634	0	0	1.12978
1901	6.59833	6.37761	0.22072	2.85418	-4.43827	3.24513	0	0	1.14386
1897	5.23263	6.26767	-1.03504	2.79358	-4.36142	3.17687	0	0	1.16141
1893	7.46831	6.1749	1.29341	2.73462	-4.28705	3.10257	0	0	1.18207
1889	3.61429	6.09824	-2.48396	2.67781	-4.21541	3.02352	0	0	1.20553
1885	4.33817	6.03393	-1.69576	2.62365	-4.14678	2.94115	0	0	1.23168
1881	4.79501	5.97922	-1.18421	2.57234	-4.0814	2.85681	0	0	1.26056
1877	6.36733	5.93194	0.43539	2.52403	-4.01955	2.77178	0	0	1.2923
1873	7.69152	5.89043	1.80109	2.47904	-3.96144	2.68724	0	0	1.32703
1869	7.78632	5.85346	1.93286	2.43745	-3.90719	2.60422	0	0	1.36487
1865	6.98578	5.82028	1.1655	2.39905	-3.85688	2.52358	0	0	1.40592
1861	6.21541	5.79131	0.42409	2.36364	-3.81052	2.446	0	0	1.45027
1857	5.49621	5.76784	-0.27164	2.33113	-3.76817	2.37201	0	0	1.49797
1853	6.5682	5.75117	0.81703	2.30159	-3.72987	2.30196	0	0	1.54923
1849	7.26282	5.74314	1.51967	2.2751	-3.69561	2.23625	0	0	1.60438
1845	6.21126	5.74545	0.46581	2.25168	-3.66535	2.17516	0	0	1.66369
1841	4.08199	5.75915	-1.67716	2.2314	-3.63893	2.11882	0	0	1.72731
1837	2.58299	5.78489	-3.20189	2.21448	-3.61609	2.06735	0	0	1.79527
1833	3.61126	5.82249	-2.21123	2.20069	-3.59626	2.02094	0	0	1.86745
1829	4.77841	5.87114	-1.09272	2.18952	-3.5788	1.97974	0	0	1.94357
1825	5.07561	5.92971	-0.8541	2.18063	-3.56302	1.94389	0	0	2.02322
1821	5.81189	5.99733	-0.18544	2.17415	-3.54834	1.91369	0	0	2.10588
1817	6.68751	6.07294	0.61457	2.1705	-3.53437	1.88958	0	0	2.19092
1813	6.69146	6.15533	0.53612	2.16998	-3.52078	1.87211	0	0	2.27766
1809	5.03647	6.24309	-1.20661	2.17264	-3.50743	1.86182	0	0	2.36536
1805	3.59476	6.33441	-2.73965	2.17831	-3.49426	1.85923	0	0	2.45329
1801	4.98149	6.42789	-1.4464	2.18641	-3.4811	1.86465	0	0	2.54077
1797	4.85831	6.52311	-1.6648	2.19609	-3.46772	1.878	0	0	2.62743
1793	5.47773	6.62022	-1.1425	2.20655	-3.45392	1.89887	0	0	2.71314
1789	5.90839	6.72032	-0.81193	2.21661	-3.43934	1.92663	0	0	2.79795
1785	4.99608	6.82559	-1.82952	2.22476	-3.42353	1.96058	0	0	2.88199
1781	6.46723	6.93763	-0.4704	2.22988	-3.40613	2.00021	0	0	2.96548
1777	8.06995	7.05688	1.01308	2.231	-3.38686	2.04499	0	0	3.04871
1773	5.60886	7.18232	-1.57346	2.22712	-3.36546	2.09432	0	0	3.13205
1769	9.83645	7.31186	2.52459	2.21736	-3.34177	2.14746	1	1.22893	3.21594
1765	8.48335	7.44309	1.04026	2.20118	-3.31571	2.20368	0	0	3.30056
1761	9.40453	7.57407	1.83046	2.1787	-3.28736	2.26216	0	0	3.38578
1757	9.84973	7.70368	2.14605	2.15048	-3.25696	2.322	0	0	3.47117
1753	10.5373	7.831	2.70627	2.11717	-3.22476	2.38241	1	2.35639	3.55607
1749	8.8512	7.95442	0.89678	2.0799	-3.19113	2.44208	0	0	3.63969
1745	9.82479	8.07212	1.75267	2.04	-3.15643	2.49962	0	0	3.72114
1741	7.20256	8.18285	-0.9803	1.99869	-3.12098	2.55391	0	0	3.79949
1737	8.37455	8.28612	0.08843	1.95698	-3.085	2.60417	0	0	3.87388
1733	9.03718	8.38179	0.65539	1.9161	-3.04878	2.64955	0	0	3.9438
1729	9.01002	8.46945	0.54057	1.87693	-3.01256	2.68972	0	0	4.00898
1725	7.82318	8.54804	-0.72486	1.83953	-2.97642	2.72505	0	0	4.06942
1721	8.40413	8.616	-0.21187	1.80361	-2.9405	2.75622	0	0	4.12524
1717	8.25738	8.67161	-0.41423	1.76875	-2.90494	2.78406	0	0	4.17676
1713	7.54591	8.7134	-1.16749	1.73455	-2.87004	2.80945	0	0	4.22436
1709	9.27112	8.74069	0.53042	1.70099	-2.83623	2.83313	0	0	4.26857
1705	9.22644	8.75391	0.47253	1.66813	-2.80391	2.85561	0	0	4.30993
1701	8.08341	8.75463	-0.67122	1.63606	-2.77338	2.87697	0	0	4.34905
1697	10.9968	8.74503	2.25176	1.60488	-2.74492	2.89723	0	0	4.38641
1693	12.6145	8.72708	3.88743	1.57466	-2.71872	2.91637	1	14.7983	4.42233
1689	9.08935	8.70248	0.38687	1.54553	-2.695	2.93432	0	0	4.45684
1685	8.86218	8.67287	0.18931	1.51795	-2.67396	2.95105	0	0	4.48969
1681	7.28615	8.63974	-1.35359	1.49224	-2.6558	2.96648	0	0	4.52052
1677	7.17987	8.60395	-1.42408	1.46851	-2.64069	2.98052	0	0	4.54888
1673	6.60536	8.56582	-1.96047	1.44706	-2.62875	2.99308	0	0	4.57438
1669	8.75472	8.52537	0.22935	1.42812	-2.62002	3.00412	0	0	4.59662
1665	11.2404	8.48232	2.75805	1.41157	-2.6144	3.01362	0	0	4.61523
1661	10.3949	8.43648	1.95842	1.39713	-2.61166	3.02159	1	9.53885	4.62983
1657	7.72105	8.38739	-0.66633	1.38458	-2.61157	3.02807	0	0	4.63998
1653	7.72105	8.33447	-0.61341	1.37373	-2.61387	3.03309	0	0	4.64512
1649	8.56642	8.27797	0.28846	1.36438	-2.61815	3.03673	0	0	4.64473
1645	8.62219	8.21891	0.40328	1.3562	-2.62393	3.03904	0	0	4.63839
1641	8.91083	8.15885	0.75198	1.34935	-2.63099	3.04004	0	0	4.62592
1637	8.94763	8.10012	0.84752	1.34465	-2.63934	3.03979	0	0	4.60737
1633	7.76761	8.0451	-0.2775	1.34295	-2.64917	3.03833	0	0	4.583
1629	6.89498	7.99543	-1.10045	1.34458	-2.66069	3.03567	0	0	4.55324
1625	6.98491	7.95148	-0.96657	1.34925	-2.67403	3.0318	0	0	4.51871
1621	7.21966	7.91313	-0.69347	1.35668	-2.6893	3.02679	0	0	4.4802
1617	6.97286	7.87991	-0.90705	1.36683	-2.7066	3.02077	0	0	4.43878
1613	7.19241	7.85133	-0.65892	1.37963	-2.72594	3.01388	0	0	4.39568
1609	8.71097	7.82703	0.88395	1.39473	-2.74713	3.0063	0	0	4.35208
1605	10.3258	7.80656	2.51925	1.4116	-2.7699	2.99817	1	4.43059	4.30893
1601	6.16535	7.78939	-1.62404	1.42952	-2.79397	2.98967	0	0	4.26675
1597	7.00553	7.77455	-0.76902	1.44761	-2.81911	2.98095	0	0	4.22562
1593	7.84571	7.76092	0.08479	1.46552	-2.84518	2.97209	0	0	4.18524
1589	7.49875	7.74776	-0.24901	1.48341	-2.87219	2.96319	0	0	4.14506
1585	6.46163	7.73564	-1.27402	1.50139	-2.90007	2.95433	0	0	4.10444
1581	6.04686	7.72613	-1.67927	1.51952	-2.92866	2.94563	0	0	4.0627
1577	5.09723	7.72117	-2.62394	1.53783	-2.95776	2.93716	0	0	4.01926
1573	7.29592	7.72273	-0.4268	1.55629	-2.98717	2.92896	0	0	3.97377
1569	7.30359	7.732	-0.42841	1.57484	-3.01666	2.921	0	0	3.92635
1565	6.77078	7.74906	-0.97828	1.59378	-3.04615	2.91315	0	0	3.87761
1561	6.47634	7.77336	-1.29702	1.61332	-3.0755	2.90532	0	0	3.82838
1557	9.67278	7.80472	1.86806	1.6334	-3.1046	2.89739	1	0.93863	3.77951
1553	8.61307	7.84354	0.76954	1.65394	-3.13346	2.88927	0	0	3.73183
1549	9.24866	7.88957	1.35909	1.67517	-3.1623	2.88086	0	0	3.68618
1545	10.8074	7.9417	2.8657	1.69771	-3.19151	2.87207	0	0	3.64319
1541	11.6586	7.99902	3.65961	1.72242	-3.22159	2.86277	1	15.5259	3.60324
1537	9.3484	8.06093	1.28747	1.7503	-3.25307	2.85281	0	0	3.56642
1533	4.95509	8.1273	-3.17221	1.78236	-3.28642	2.84218	0	0	3.53254
1529	6.18669	8.19881	-2.01212	1.81932	-3.32197	2.83103	0	0	3.50146
1525	6.61235	8.27694	-1.6646	1.861	-3.35961	2.81966	0	0	3.47316
1521	6.90097	8.36351	-1.46254	1.90667	-3.39901	2.80837	0	0	3.44762
1517	7.79411	8.46025	-0.66614	1.95555	-3.43971	2.79758	0	0	3.42478
1513	8.30729	8.5679	-0.26061	2.00638	-3.4811	2.78763	0	0	3.40449
1509	8.2999	8.68558	-0.38568	2.05807	-3.52266	2.77872	0	0	3.38651
1505	6.93905	8.81077	-1.87173	2.10974	-3.56394	2.77092	0	0	3.37048
1501	9.08915	8.94044	0.14871	2.16067	-3.60455	2.76418	0	0	3.35601
1497	7.8804	9.07202	-1.19162	2.21013	-3.64413	2.75834	0	0	3.34296
1493	9.39323	9.2033	0.18993	2.2577	-3.68241	2.75324	0	0	3.33145
1489	10.9334	9.33255	1.60081	2.30332	-3.71921	2.74875	0	0	3.32181
1485	9.24058	9.45898	-0.21839	2.34727	-3.75443	2.74477	0	0	3.31435
1481	10.7117	9.58311	1.12855	2.3899	-3.78806	2.74115	0	0	3.30927
1477	8.59218	9.7063	-1.11413	2.43147	-3.82005	2.73773	0	0	3.30665
1473	8.83478	9.83022	-0.99544	2.47218	-3.85043	2.73436	0	0	3.30642
1469	9.22424	9.95654	-0.7323	2.51197	-3.87929	2.73092	0	0	3.30841
1465	9.2798	10.0861	-0.80627	2.55075	-3.90672	2.72736	0	0	3.31239
1461	10.7722	10.2185	0.55377	2.58908	-3.9331	2.72369	0	0	3.31817
1457	8.68073	10.352	-1.67123	2.62804	-3.95898	2.72003	0	0	3.3257
1453	6.84035	10.4837	-3.64337	2.66863	-3.98494	2.71643	0	0	3.33494
1449	11.0739	10.6113	0.46252	2.71109	-4.0113	2.71293	0	0	3.3459
1445	11.3309	10.7333	0.59764	2.75467	-4.03795	2.70961	0	0	3.35882
1441	12.0315	10.8483	1.18314	2.79864	-4.06463	2.7066	0	0	3.37414
1437	13.492	10.9562	2.53579	2.8421	-4.09096	2.70406	0	0	3.39234
1433	14.3995	11.0583	3.34121	2.88433	-4.11661	2.7021	0	0	3.41392
1429	14.8715	11.1572	3.71427	2.92467	-4.14127	2.70076	0	0	3.43924
1425	16.0854	11.2544	4.83107	2.96225	-4.16464	2.70006	1	18.6917	3.46838
1421	12.899	11.3496	1.54947	2.99615	-4.18642	2.70001	0	0	3.50109
1417	11.216	11.4411	-0.22507	3.02564	-4.20642	2.70062	0	0	3.53677
1413	9.0247	11.526	-2.50131	3.05006	-4.22451	2.70193	0	0	3.57469
1409	9.92058	11.6013	-1.68074	3.06897	-4.24056	2.70389	0	0	3.61411
1405	9.46986	11.6647	-2.19489	3.0819	-4.25445	2.70642	0	0	3.6545
1401	10.9784	11.7152	-0.73676	3.08857	-4.26615	2.70933	0	0	3.69562
1397	10.9769	11.7523	-0.77535	3.08881	-4.27567	2.71232	0	0	3.73733
1393	11.2147	11.7755	-0.56078	3.08252	-4.28305	2.7151	0	0	3.77952
1389	14.0876	11.7843	2.30322	3.07003	-4.28854	2.71735	0	0	3.82209
1385	13.3704	11.7786	1.59187	3.05186	-4.29249	2.71881	0	0	3.86489
1381	13.3367	11.7584	1.57837	3.02887	-4.29536	2.71933	0	0	3.90768
1377	15.7534	11.7239	4.0295	3.00189	-4.29765	2.71884	1	4.11046	3.94999
1373	10.742	11.6759	-0.93386	2.9719	-4.29987	2.71736	0	0	3.99105
1369	10.0016	11.6146	-1.61307	2.94008	-4.30253	2.71494	0	0	4.02982
1365	8.23655	11.541	-3.30442	2.90801	-4.30608	2.71171	0	0	4.06512
1361	9.04096	11.4562	-2.41523	2.87699	-4.31082	2.70775	0	0	4.09585
1357	11.7773	11.3626	0.41473	2.84751	-4.31673	2.70323	0	0	4.12111
1353	13.6412	11.2638	2.37738	2.81933	-4.32354	2.69838	0	0	4.1404
1349	13.1773	11.1637	2.01356	2.79209	-4.33088	2.69356	0	0	4.1534
1345	12.9721	11.0652	1.90691	2.76545	-4.3383	2.68917	0	0	4.16007
1341	13.9846	10.97	3.01457	2.73901	-4.34536	2.68562	0	0	4.16074
1337	17.3244	10.8783	6.4461	2.71239	-4.35166	2.68325	1	20.0464	4.15609
1333	10.6521	10.7888	-0.13673	2.68539	-4.35699	2.68232	0	0	4.14675
1329	10.0109	10.6992	-0.6883	2.65821	-4.36129	2.68302	0	0	4.13315
1325	8.81727	10.6067	-1.78946	2.63091	-4.36461	2.68539	0	0	4.1156
1321	6.73801	10.5086	-3.77056	2.60339	-4.36697	2.68932	0	0	4.09437
1317	8.76918	10.4038	-1.63458	2.57586	-4.3686	2.69462	0	0	4.0697
1313	9.26377	10.2926	-1.02882	2.54835	-4.36974	2.70103	0	0	4.04191
1309	11.1166	10.1768	0.9398	2.52098	-4.37058	2.70826	0	0	4.01153
1305	12.5894	10.0589	2.53046	2.49397	-4.37131	2.71593	1	0.14595	3.97911
1301	8.89809	9.94159	-1.0435	2.46743	-4.37217	2.7237	0	0	3.94508
1297	8.97115	9.82644	-0.85529	2.44139	-4.3734	2.73122	0	0	3.90966
1293	10.6761	9.71406	0.962	2.416	-4.37523	2.73821	0	0	3.87298
1289	9.38275	9.60394	-0.22119	2.39206	-4.37799	2.74453	0	0	3.83511
1285	8.00716	9.49479	-1.48763	2.37105	-4.38208	2.75019	0	0	3.79614
1281	8.81754	9.38579	-0.56826	2.35457	-4.38792	2.75522	0	0	3.75622
1277	6.41848	9.27653	-2.85804	2.34438	-4.39584	2.75965	0	0	3.71558
1273	7.34315	9.16771	-1.82456	2.34191	-4.40607	2.76348	0	0	3.67452
1269	8.31816	9.06196	-0.7438	2.34728	-4.41853	2.76666	0	0	3.63355
1265	8.31496	8.96255	-0.64759	2.35958	-4.43289	2.76903	0	0	3.59346
1261	10.7431	8.87228	1.87079	2.378	-4.44876	2.77053	0	0	3.55525
1257	9.85981	8.79288	1.06693	2.40214	-4.46585	2.77125	0	0	3.51994
1253	11.9491	8.72524	3.22387	2.43141	-4.4839	2.77123	1	3.16981	3.48834
1249	9.6072	8.67043	0.93677	2.46468	-4.50265	2.77044	0	0	3.46093
1245	7.08925	8.62975	-1.5405	2.50018	-4.52176	2.76888	0	0	3.43781
1241	8.71501	8.60418	0.11083	2.53649	-4.54098	2.76662	0	0	3.4187
1237	9.16673	8.59299	0.57374	2.57253	-4.56009	2.76376	0	0	3.40308
1233	6.09148	8.59407	-2.50259	2.60748	-4.57892	2.76033	0	0	3.39027
1229	6.14422	8.60635	-2.46213	2.64063	-4.59734	2.7563	0	0	3.37962
1225	8.63477	8.62996	0.00482	2.67099	-4.61516	2.7516	0	0	3.37064
1221	6.24801	8.66569	-2.41768	2.69759	-4.63222	2.74621	0	0	3.36313
1217	9.36532	8.71431	0.65101	2.72007	-4.64846	2.74009	0	0	3.35713
1213	11.1723	8.77584	2.39649	2.73836	-4.66387	2.73323	0	0	3.3529
1209	9.9657	8.84961	1.11609	2.75304	-4.67858	2.72562	0	0	3.35069
1205	8.5313	8.9337	-0.40239	2.7653	-4.69284	2.71729	0	0	3.35092
1201	6.66295	9.02485	-2.36191	2.77658	-4.70698	2.70826	0	0	3.35406
1197	6.13464	9.12015	-2.98551	2.7881	-4.72117	2.69861	0	0	3.36078
1193	6.02046	9.21714	-3.19669	2.80056	-4.73544	2.68848	0	0	3.37178
1189	9.24308	9.31392	-0.07084	2.81413	-4.74958	2.67807	0	0	3.38772
1185	6.48412	9.4097	-2.92558	2.8285	-4.76326	2.6676	0	0	3.40912
1181	9.4131	9.50461	-0.09151	2.8432	-4.77604	2.65732	0	0	3.43642
1177	9.73437	9.59887	0.1355	2.85735	-4.78742	2.64747	0	0	3.47007
1173	9.041	9.69305	-0.65205	2.87012	-4.79694	2.63831	0	0	3.51079
1169	7.20853	9.78795	-2.57941	2.88074	-4.80416	2.63019	0	0	3.55929
1165	7.91102	9.88427	-1.97325	2.88842	-4.80864	2.62358	0	0	3.61612
1161	10.0015	9.982	0.01945	2.89228	-4.80999	2.61899	0	0	3.68156
1157	14.5408	10.0799	4.46096	2.89146	-4.80792	2.61678	0	0	3.75563
1153	14.7751	10.1756	4.59943	2.88571	-4.80238	2.61707	0	0	3.83799
1149	15.918	10.2665	5.65145	2.87491	-4.79343	2.61971	1	36.3585	3.92794
1145	9.7753	10.3501	-0.57478	2.85911	-4.78118	2.62439	0	0	4.02445
1141	6.89717	10.4242	-3.527	2.83878	-4.7659	2.63062	0	0	4.12623
1137	10.5446	10.487	0.05764	2.81454	-4.74792	2.63792	0	0	4.23199
1133	12.8991	10.5376	2.36155	2.78651	-4.72746	2.64593	0	0	4.34062
1129	13.0874	10.5757	2.51171	2.75486	-4.70466	2.65444	0	0	4.45116
1125	12.4595	10.6011	1.85842	2.72048	-4.67978	2.66335	0	0	4.56294
1121	12.5087	10.6133	1.89538	2.68455	-4.65307	2.67257	0	0	4.67549
1117	13.5796	10.6124	2.96722	2.64875	-4.6249	2.68207	1	1.27385	4.78845
1113	12.1293	10.598	1.53124	2.61474	-4.59569	2.69179	0	0	4.90159
1109	6.85884	10.5705	-3.71168	2.58365	-4.56572	2.70177	0	0	5.01481
1105	9.63498	10.5312	-0.89627	2.55601	-4.53505	2.71208	0	0	5.12835
1101	10.7483	10.4822	0.26616	2.53134	-4.50356	2.72282	0	0	5.24276
1097	10.6441	10.4257	0.21837	2.50864	-4.47107	2.73409	0	0	5.35863
1093	11.0095	10.3641	0.64542	2.48665	-4.43733	2.74595	0	0	5.47641
1089	12.1059	10.2988	1.80706	2.46387	-4.40213	2.75848	0	0	5.59638
1085	8.70564	10.2305	-1.52482	2.439	-4.3653	2.77177	0	0	5.7186
1081	10.1196	10.1597	-0.04007	2.4108	-4.32682	2.78589	0	0	5.84288
1077	12.543	10.0871	2.45587	2.37859	-4.2868	2.8009	0	0	5.96872
1073	12.7485	10.0143	2.73421	2.34221	-4.24554	2.81687	1	2.34639	6.09521
1069	10.7996	9.94288	0.85676	2.30163	-4.20341	2.8338	0	0	6.22095
1065	8.06664	9.87367	-1.80703	2.25698	-4.16085	2.85163	0	0	6.34415
1061	7.29986	9.80671	-2.50684	2.20893	-4.11832	2.87022	0	0	6.46285
1057	7.19609	9.7412	-2.54511	2.159	-4.07646	2.88939	0	0	6.57515
1053	7.36841	9.67584	-2.30743	2.10858	-4.03583	2.90898	0	0	6.67944
1049	7.988	9.60943	-1.62143	2.05905	-3.997	2.92879	0	0	6.77456
1045	7.988	9.54157	-1.55358	2.01124	-3.96035	2.94864	0	0	6.85974
1041	7.988	9.47345	-1.48545	1.96541	-3.92605	2.96835	0	0	6.93461
1037	7.988	9.40681	-1.41881	1.9221	-3.89438	2.98774	0	0	6.99928
1033	7.82917	9.34266	-1.51348	1.88214	-3.86603	3.00646	0	0	7.05425
1029	8.64263	9.28131	-0.63868	1.84655	-3.84172	3.02406	0	0	7.10041
1025	11.1841	9.2237	1.96042	1.81614	-3.82206	3.04001	1	0.57716	7.13876
1021	9.07624	9.17108	-0.09484	1.79119	-3.80741	3.05388	0	0	7.17033
1017	13.9079	9.12495	4.78293	1.77154	-3.79786	3.06538	0	0	7.19596
1013	11.7721	9.08713	2.68498	1.75652	-3.79326	3.07438	1	19.6992	7.21633
1009	9.36516	9.05947	0.30568	1.74508	-3.79331	3.08082	0	0	7.23179
1005	10.9173	9.04409	1.87319	1.73668	-3.7977	3.08438	1	0.54603	7.24243
1001	8.78017	9.04163	-0.26146	1.73144	-3.80617	3.08536	0	0	7.24815
997	8.40078	9.05143	-0.65065	1.72949	-3.81829	3.08425	0	0	7.24879
993	8.1443	9.07171	-0.92741	1.73082	-3.83356	3.08153	0	0	7.24414
989	7.2293	9.09983	-1.87053	1.7355	-3.8516	3.07771	0	0	7.23396
985	8.94347	9.13304	-0.18957	1.74378	-3.87226	3.07342	0	0	7.21804
981	11.864	9.16851	2.69545	1.75617	-3.89553	3.06926	1	3.7571	7.19628
977	8.11704	9.20315	-1.08611	1.7731	-3.92137	3.06568	0	0	7.16851
973	7.27182	9.23332	-1.96151	1.79522	-3.94976	3.0629	0	0	7.13443
969	7.61046	9.25638	-1.64592	1.8231	-3.98067	3.06089	0	0	7.09366
965	9.39761	9.27168	0.12593	1.85704	-4.01412	3.05947	0	0	7.04589
961	9.41967	9.28024	0.13942	1.8969	-4.04998	3.05843	0	0	6.99092
957	7.62396	9.28371	-1.65974	1.94206	-4.08799	3.05778	0	0	6.92877
953	7.03022	9.28409	-2.25387	1.99217	-4.12801	3.05744	0	0	6.85973
949	7.63837	9.28338	-1.64501	2.04689	-4.16994	3.0574	0	0	6.78447
945	8.98258	9.28347	-0.30089	2.1058	-4.2137	3.05767	0	0	6.70403
941	9.38874	9.28627	0.10247	2.16866	-4.25921	3.05819	0	0	6.61968
937	7.34632	9.29412	-1.9478	2.2356	-4.3064	3.0589	0	0	6.53267
933	12.0146	9.30885	2.70579	2.30631	-4.35506	3.05983	1	1.59793	6.4442
929	9.8948	9.3328	0.562	2.3798	-4.40484	3.06111	0	0	6.35519
925	11.2412	9.36791	1.87326	2.45494	-4.45538	3.0629	0	0	6.26622
921	12.5616	9.41572	3.14588	2.53043	-4.50626	3.06547	1	2.46181	6.17758
917	9.00826	9.47659	-0.46833	2.60543	-4.55705	3.06905	0	0	6.08932
913	12.8431	9.54946	3.29369	2.67964	-4.60751	3.07382	1	2.45619	6.00124
909	9.21315	9.63272	-0.41957	2.75299	-4.65741	3.07996	0	0	5.91278
905	10.1654	9.72596	0.43941	2.82551	-4.70654	3.08776	0	0	5.82314
901	8.48102	9.83039	-1.34936	2.89708	-4.75464	3.09739	0	0	5.73142
897	7.57296	9.94637	-2.37341	2.96768	-4.80151	3.10894	0	0	5.63674
893	10.1358	10.0739	0.06194	3.0375	-4.84701	3.12252	0	0	5.53844
889	6.92512	10.2131	-3.28801	3.10715	-4.89126	3.13819	0	0	5.4361
885	10.6249	10.365	0.2599	3.17707	-4.93434	3.15586	0	0	5.32974
881	7.2712	10.5307	-3.25947	3.2473	-4.9763	3.17528	0	0	5.21976
877	9.68758	10.7098	-1.02219	3.31765	-5.0171	3.19611	0	0	5.10681
873	11.1732	10.9019	0.27126	3.38763	-5.05666	3.21788	0	0	4.9919
869	11.2999	11.1061	0.19373	3.45658	-5.0949	3.24008	0	0	4.87628
865	9.7123	11.3211	-1.60885	3.52358	-5.13182	3.26217	0	0	4.76126
861	11.3783	11.5456	-0.16728	3.58766	-5.16752	3.28359	0	0	4.64801
857	9.31048	11.7779	-2.46743	3.6483	-5.20223	3.30369	0	0	4.53757
853	10.0105	12.0166	-2.00613	3.70529	-5.23628	3.32183	0	0	4.43072
849	8.43512	12.2609	-3.82577	3.75905	-5.27018	3.33731	0	0	4.32802
845	13.4572	12.5103	0.94688	3.81016	-5.30441	3.34948	0	0	4.22978
841	7.4871	12.7641	-5.27704	3.85909	-5.3392	3.35784	0	0	4.13625
837	15.4048	13.0208	2.38397	3.90645	-5.37445	3.36219	0	0	4.0476
833	13.1314	13.2787	-0.14721	3.95267	-5.41013	3.36249	0	0	3.96383
829	16.8582	13.5352	3.32298	3.99822	-5.44611	3.35893	0	0	3.88487
825	11.9897	13.7876	-1.79786	4.04367	-5.4821	3.3518	0	0	3.81089
821	13.955	14.0336	-0.07859	4.0895	-5.51774	3.34149	0	0	3.74227
817	9.57483	14.2719	-4.69705	4.13593	-5.55254	3.32853	0	0	3.67946
813	16.3789	14.5019	1.87699	4.18355	-5.58611	3.31367	0	0	3.62293
809	24.5185	14.7232	9.79527	4.23228	-5.61862	3.29757	1	22.252	3.57318
805	11.703	14.936	-3.23303	4.28251	-5.65237	3.28011	0	0	3.53063
801	15.3122	15.1401	0.17214	4.33607	-5.69091	3.26083	0	0	3.49553
797	17.6969	15.3357	2.36125	4.3937	-5.73876	3.23932	0	0	3.46798
793	20.6612	15.5223	5.13891	4.4547	-5.80057	3.21518	0	0	3.44787
789	24.2927	15.6988	8.59384	4.51782	-5.88054	3.188	1	23.8012	3.43498
785	14.4419	15.8644	-1.42257	4.58258	-5.98189	3.15748	0	0	3.42894
781	18.2423	16.0173	2.22496	4.64935	-6.10669	3.12322	0	0	3.42946
777	13.663	16.1552	-2.49221	4.71732	-6.25627	3.08499	0	0	3.43626
773	19.5344	16.2753	3.25916	4.78497	-6.43134	3.04296	0	0	3.44898
769	16.9702	16.3745	0.59574	4.85023	-6.63193	2.9975	0	0	3.46718
765	16.9931	16.4499	0.54323	4.91125	-6.85737	2.94907	0	0	3.49038
761	12.794	16.4992	-3.70517	4.9662	-7.10637	2.89814	0	0	3.51808
757	18.5613	16.5209	2.0404	5.01342	-7.37716	2.84528	0	0	3.54976
753	18.1631	16.5159	1.64725	5.05152	-7.66766	2.79095	0	0	3.58484
749	16.1972	16.4868	-0.28956	5.07956	-7.97571	2.73563	0	0	3.6227
745	14.4301	16.4375	-2.00741	5.09706	-8.29908	2.6798	0	0	3.66265
741	13.8251	16.372	-2.54688	5.10399	-8.63548	2.6239	0	0	3.70392
737	17.4202	16.2939	1.12623	5.10068	-8.98263	2.56834	0	0	3.74571
733	11.9784	16.2056	-4.22721	5.08769	-9.33829	2.51344	0	0	3.7873
729	18.5538	16.1101	2.44375	5.06586	-9.70042	2.45947	0	0	3.82819
725	18.9171	16.0115	2.90557	5.03631	-10.0674	2.40668	0	0	3.86793
721	17.5676	15.9138	1.65374	5.00022	-10.4381	2.35523	0	0	3.90623
717	17.1196	15.8195	1.30011	4.95888	-10.8118	2.30521	0	0	3.94306
713	17.5723	15.7295	1.84279	4.91333	-11.1882	2.25665	0	0	3.9786
709	16.3857	15.6419	0.74378	4.86462	-11.5671	2.20948	0	0	4.01326
705	18.294	15.544	2.74996	4.77289	-11.93	2.1724	0	0	4.03858
701	14.4579	15.4068	-0.94887	4.6877	-12.276	2.1376	0	0	4.07001
697	12.7575	15.2376	-2.48009	4.60814	-12.6151	2.10368	0	0	4.10496
693	20.1728	15.0472	5.12562	4.53229	-12.9532	2.0699	1	2.37334	4.14141
689	14.0688	14.843	-0.77412	4.45839	-13.2922	2.03603	0	0	4.17823
685	13.657	14.6292	-0.97225	4.38505	-13.6327	2.00204	0	0	4.2148
681	12.7415	14.4087	-1.6672	4.31115	-13.9743	1.96804	0	0	4.25083
677	14.5598	14.1832	0.37656	4.23598	-14.3166	1.93414	0	0	4.28619
673	10.8025	13.9541	-3.15161	4.15909	-14.659	1.90044	0	0	4.32084
669	11.165	13.7223	-2.55735	4.08023	-15.0011	1.86702	0	0	4.35483
665	12.3673	13.4886	-1.12128	3.99927	-15.3422	1.83395	0	0	4.38822
661	14.0357	13.2537	0.78204	3.91615	-15.6821	1.8013	0	0	4.42111
657	18.051	13.018	5.03305	3.83091	-16.0201	1.76909	0	0	4.4536
653	17.5661	12.7818	4.78431	3.74363	-16.356	1.73738	0	0	4.48583
649	16.7458	12.5453	4.20046	3.65442	-16.6894	1.7062	1	16.7331	4.5179
645	14.5206	12.3085	2.21209	3.56344	-17.0199	1.67556	0	0	4.54996
641	9.87392	12.071	-2.19712	3.47085	-17.3473	1.64549	0	0	4.58211
637	18.9632	11.8328	7.13043	3.37685	-17.6713	1.61599	0	0	4.61449
633	17.5777	11.5935	5.98421	3.28164	-17.9917	1.58709	0	32.2807	4.64722
629	12.7903	11.3527	1.43753	3.18545	-18.3084	1.55879	0	0	4.68039
625	12.0688	11.1099	0.95883	3.08847	-18.6213	1.53109	0	0	4.71411
621	10.577	10.8646	-0.28766	2.99088	-18.9302	1.50398	0	0	4.74846
617	10.5783	10.6162	-0.0379	2.89286	-19.2352	1.47747	0	0	4.78351
